# Supplementary material
Source: publisher figshare collection journal article supplement (https://gsajournals.figshare.com/ndownloader/files/22699340)
Supplement: Supplementary file 1 [file 22699340]

Table S1. List of PCR primer sequences, product sizes and fragment sizes after restriction digestion.

| No. | Transcript ID | Gene name | Nucleic acid change | Amino acid change | Forward/  Reverse primer | Length (bp) | Restriction enzyme | Digestion size (bp) |
| --- | --- | --- | --- | --- | --- | --- | --- | --- |
| 1 | ASIC001633 | *Ace-1* | 781G>A | Gly261Ser | GTGCGACCATGTGGAACC/  ACCACGATCACGTTCTCCTC | 193 | *AluI* | 75/118 |
| 2 | ASIC009067 | ATPase | 20C>T | Pro7Leu | GCAAAGTCCAATCCCAGGTA/  GGGCTCATAAACCGAGTGAG | 195 | *MnlI* | 82/113 |
| 3 | ASIC008288 | Brain chitinase | 1945G>C | Ala649Pro | CAAGCTTGGTCCGTACACCT/  ACTGACAGATTCGGCTGTGA | 258 | *NlaIV* | 114/144 |
| 4 | ASIC006349 | Chitinase | 358C>T | Pro120Ser | GGCATAAACGAATCGTCCAG/  CGAGGGTGTCGTGTAGTAGC | 301 | *HPY188I* | 136/165 |
| 5 | ASIC005406 | COE12O | 1802G>A | Arg601His | TGATCCAACTCCAGGGAATC/  GCGTACGCAAGGTATCCTCT | 272 | *BmgBI* | 92/180 |
| 6 | ASIC016830 | COEJHE2E | 1381T>A | Phe461Ile | CGGAGATCGGAAGAGGAAGT/  TCGTCGATGTAAGTGGATGC | 287 | *BtgZI* | 129/158 |
| 7 | ASIC020209 | CYP325G | 803C>A | Thr268Lys | TTGTGGTAAGTGCGTCTTCG/  GTGCGAGTCGAAACAGTTGA | 499 | *DrdI* | 87/412 |
| 8 | ASIC012923 | CYP4J5 | 854G>A | Arg285Gln | AAGGTCGGTGAGATGATGCT/  CAGCATGGCGTAACGTTTTT | 256 | *BsiEI* | 67/189 |
| 9 | ASIC012921 | CYP4J9 | 658A>C | Thr220Pro | ATCTTCACGCTGCTCCTGAT/  CGAAGCGATTCTTTGAGGAC | 164 | *HaeIII* | 79/85 |
| 10 | ASIC006698 | GSTe2 | 355G>C | Val119Leu | CGGACTTCTTGAAGGTTGGA/  CCGTTCGCTTCCTCGTAGTA | 605 | *XmnI* | 247/358 |
| 11 | ASIC004125 | GSTZ1 | 19T>C | Phe7Leu | AATTCGCCCAAAACATTCAG/  AGCAAATGGAAACGTTGGAC | 282 | *BsmBI* | 79/203 |
| 12 | ASIC011835 | *kdr* | 3214G>A | Ala1072Thr | TTCCCGCTTCTCTAACTGGA/  CATGGCCAACTGAACAGACA | 199 | *FauI* | 98/101 |
